# Supplementary material for: Acetylation is required for full activation of the NLRP3 inflammasome
Source: PubMed Central journal article supplement (PMC10728138; doi:10.1038/s41467-023-44203-0), 2023-12-18
Supplement: 41467_2023_44203_MOESM3_ESM.pdf [file 41467_2023_44203_MOESM3_ESM.pdf]

## Description of Additional Supplementary Files

File Name: Supplementary Movie 1

Description: **The Live cell imaging of COS-7 Cells transfected with GFP-vector under nigericin stimulation**

COS-7 Cells were transfected with Vector-GFP plasmid, 36 hours later, the cells were stimulated with nigericin (10  $\mu$ M). Images were taken every 5 min and last Validate for 2 h under ZEISS Axio observer7 microscopy. Image size, 150  $\mu$ m x 140  $\mu$ m.

File Name: Supplementary Movie 2

Description: **The Live cell imaging of COS-7 Cells transfected with NLRP3 WT-GFP-vector under nigericin stimulation**

COS-7 Cells were transfected with NLRP3-WT-GFP plasmid, 36 hours later, the cells were stimulated with nigericin (10  $\mu$ M). Images were taken every 5 min and last Validate for 2 h under ZEISS Axio observer7 microscopy. Image size, 150  $\mu$ m x 140  $\mu$ m.

File Name: Supplementary Movie 3

Description: **The Live cell imaging of COS-7 Cells transfected with NLRP3 K24R-GFP-vector under nigericin stimulation**

COS-7 Cells were transfected with NLRP3-K24R-GFP plasmid, 36 hours later, the cells were stimulated with nigericin (10  $\mu$ M). Images were taken every 5 min and last Validate for 2 h under ZEISS Axio observer7 microscopy. Image size, 150  $\mu$ m x 140  $\mu$ m.
