# Supplementary material for: Acetylation is required for full activation of the NLRP3 inflammasome
Source: Nat Commun. 2023 Dec 18;14:8396. doi: 10.1038/s41467-023-44203-0 (PMC10728138; doi:10.1038/s41467-023-44203-0)
Supplement: Supplementary file 1 — Supplementary Information [file 41467_2023_44203_MOESM1_ESM.pdf]

## Supplementary Information

### Acetylation is required for full activation of the NLRP3 inflammasome

Yening Zhang<sup>1,2</sup>, Ling Luo<sup>1</sup>, Xueming Xu<sup>1</sup>, Jianfeng Wu<sup>3</sup>, Fupeng Wang<sup>1</sup>, Yanyan Lu<sup>4</sup>, Ningjie Zhang<sup>5</sup>, Yingying Ding<sup>6</sup>, Ben Lu<sup>1,2\*</sup> Kai Zhao<sup>1,2\*</sup>

<sup>1</sup>Department of Hematology and Critical Care Medicine, the Third Xiangya Hospital, Central South University, Changsha, Hunan Province, 410000 P. R. China

<sup>2</sup>Key Laboratory of Sepsis Translational Medicine of Hunan, Central South University, Changsha, Hunan Province, 410000 P. R. China

<sup>3</sup>State Key Laboratory of Cellular Stress Biology Innovation Center for Cell Signaling Network, School of Life Sciences, Xiamen University, Xiamen, Fujian Province, 361005 P. R. China

<sup>4</sup>Department of Hematology, The Second Xiangya Hospital, Central South University, Changsha, Hunan Province, 410000 P. R. China

<sup>5</sup>Department of Blood Transfusion, The Second Xiangya Hospital, Central South University, Changsha, Hunan Province, 410000 P. R. China

<sup>6</sup>Department of Pathogen Biology, NavaMedical University, Shanghai, 200082 P. R. China,

\* Corresponding authors: xybenlu@csu.edu.cn; kaizhao@csu.edu.cn

# Supplementary Figures and Figure legends

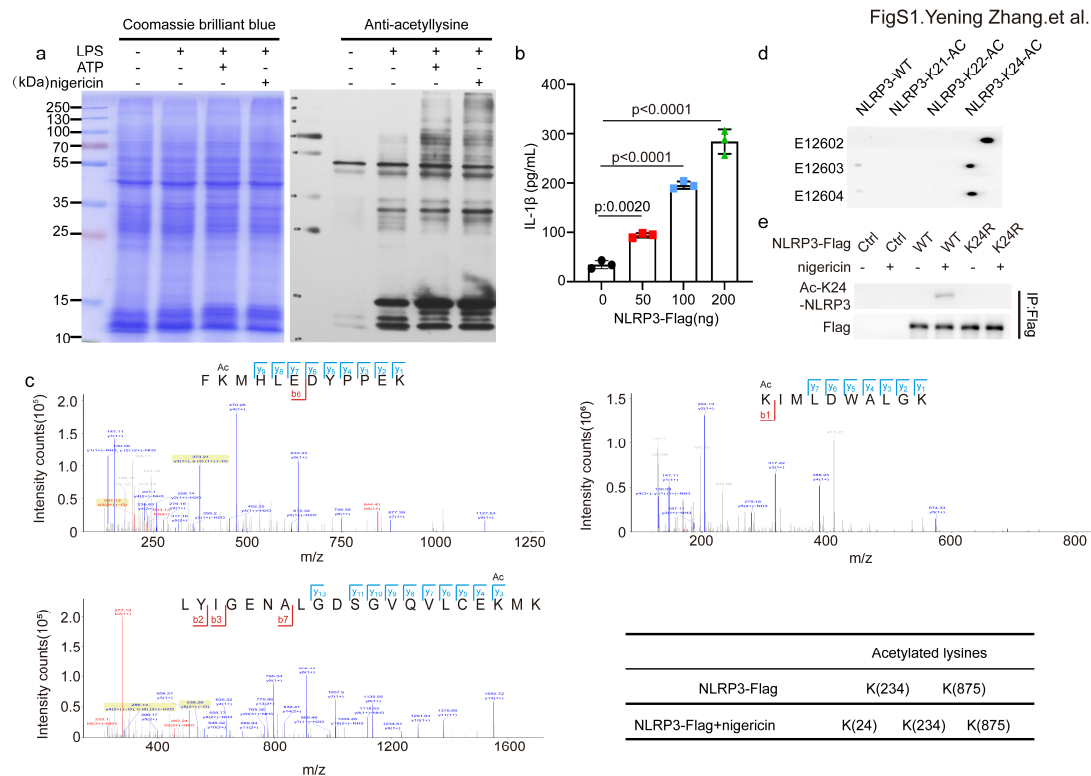

## Supplementary Figure 1. Identification of NLRP3 K24 acetylation.

**a** Coomassie bright blue staining and Immunoblot analysis of total acetylation level from lysates of peritoneal macrophages treated with LPS (100 ng/mL, 3 h) along or with ATP (5 mM, 1 h), nigericin (10  $\mu$ M, 1 h). **b** ELISA analysis of IL-1 $\beta$  in supernatants of HEK293T cells reconstituted with NLRP3 inflammasome and stimulated with nigericin (10  $\mu$ M, 1 h). **c** NLRP3 acetylation sites identified with mass spectrometry. **d-e** Immunoblot analysis of sensitivity and specificity of generated acetyl-lys<sup>24</sup>-NLRP3 antibody. **d** acetyl-lys<sup>24</sup>-NLRP3 antibody were tested on the peptides. **e** acetyl-lys<sup>24</sup>-NLRP3 antibody were tested on HEK293T cells transfected with different NLRP3 plasmid treated with nigericin or not. Results are represented as mean $\pm$  SD and typical photographs are representative of three biological independent experiments with similar results. Statistical analyses were carried out via one-way ANOVA with Dunnett's test for **b**. Source data are provided as a Source Data file.

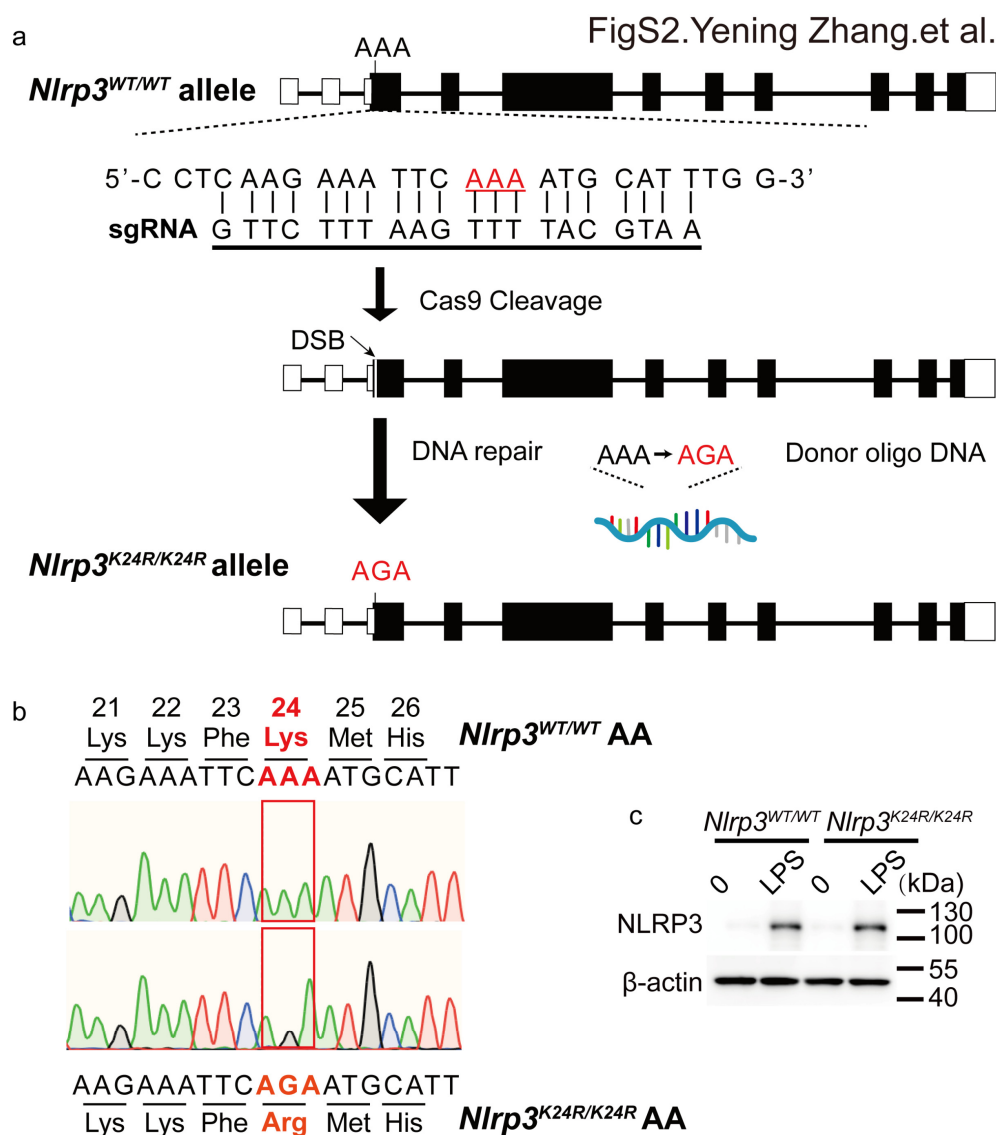

## Supplementary Figure 2. Generation of *Nlrp3*<sup>K24R/K24R</sup> knock-in mice

**a** Schematic diagram of the strategy for generating *Nlrp3*<sup>K24R/K24R</sup> knock-in mice. *Nlrp3*<sup>K24R/K24R</sup> knock-in C57BL/6 mice were generated by the CRISPR-Cas9 technology. The guide RNA (gRNA) binding site on the homologous DNA is indicated, mutated site is underlined and marked in red. **b** Genotyping of NLRP3-mutated mice. NLRP3 K24R mutation was validated by DNA sequencing. **c** Immunoblot analysis of NLRP3 expression of BMDMs from *Nlrp3*<sup>WT/WT</sup> and *Nlrp3*<sup>K24R/K24R</sup> mice treated with LPS (100 ng/mL, 3 h) or not. Typical photographs are representative of three biological independent experiments with similar results.

FigS3.Yening Zhang.et al.

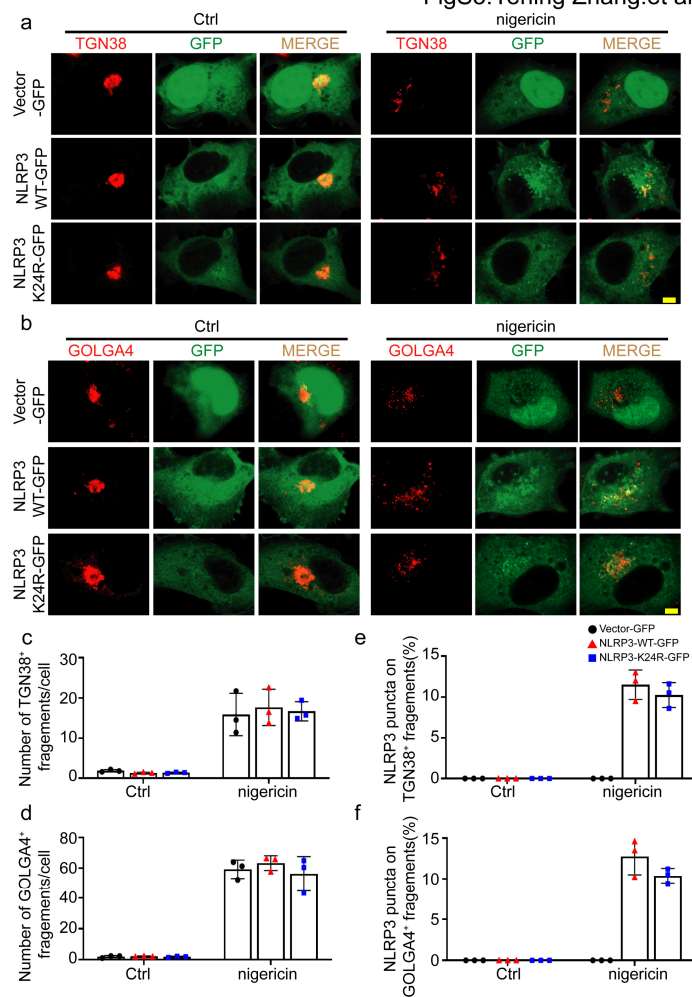

### Supplementary Figure 3. K24 acetylation of NLRP3 has no effect on the formation of dTGN.

**a-e** COS-7 cells were transfected with Vector-GFP or NLRP3(WT/K24R)-GFP plasmids and stimulated with nigericin or not (10  $\mu$ M, 1h). n=3 biologically independent experiments. **a, b** Representative fluorescent microscopy images of intracellular Co-localization of NLRP3 with the TGN markers GOLGA4 or TGN38. Scale bar = 2  $\mu$ m. **c, d** Statistical analysis of dispersion of TGN. **e, f** Co-localization analysis of dTGN and NLRP3-GFP puncta. Statistical analyses were carried out via two-way ANOVA with the Bonferroni test for **c-f**. Source data are provided as a Source Data file.

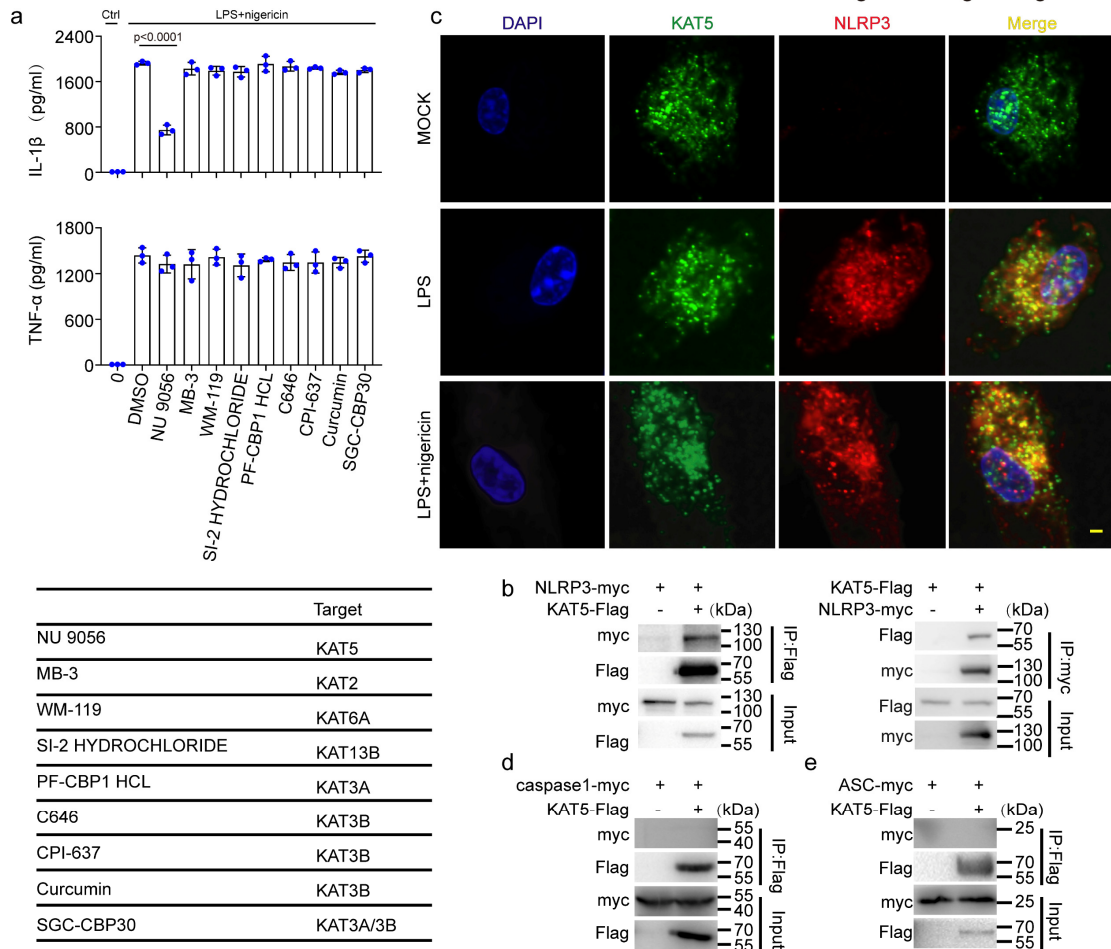

#### Supplementary Figure 4. KAT5 is involved in NLRP3 inflammasome activation.

**a** ELISA of IL-1 $\beta$  and TNF- $\alpha$  in supernatants from LPS-primed (100 ng/mL, 3h) mouse peritoneal macrophages treated with 1 $\mu$ M various acetyltransferase inhibitors and then stimulated with nigericin (10  $\mu$ M, 1 h). n=3 biologically independent experiments. **b** Co-IP analysis of interaction between KAT5 with NLRP3 from HEK293T cells transfected with myc-tagged NLRP3 and Flag-tagged KAT5. **c** Representative fluorescent microscopy images of intracellular Co-localization of KAT5 and NLRP3 in peritoneal macrophages treated with LPS (100 ng/mL, 3 h) along or with nigericin (10  $\mu$ M, 1 h). Scale bar = 2 $\mu$ m. **d, e** Co-IP analysis of interaction between KAT5 with caspase-1 or ASC from HEK293T cells transfected with myc-tagged caspase-1 or ASC with Flag-tagged KAT5. Results are represented as mean $\pm$  SD and typical photographs are representative of three biological independent experiments with similar results. Statistical analyses were carried out via one-way ANOVA with Dunnett's test for **a**. Source data are provided as a Source Data file.

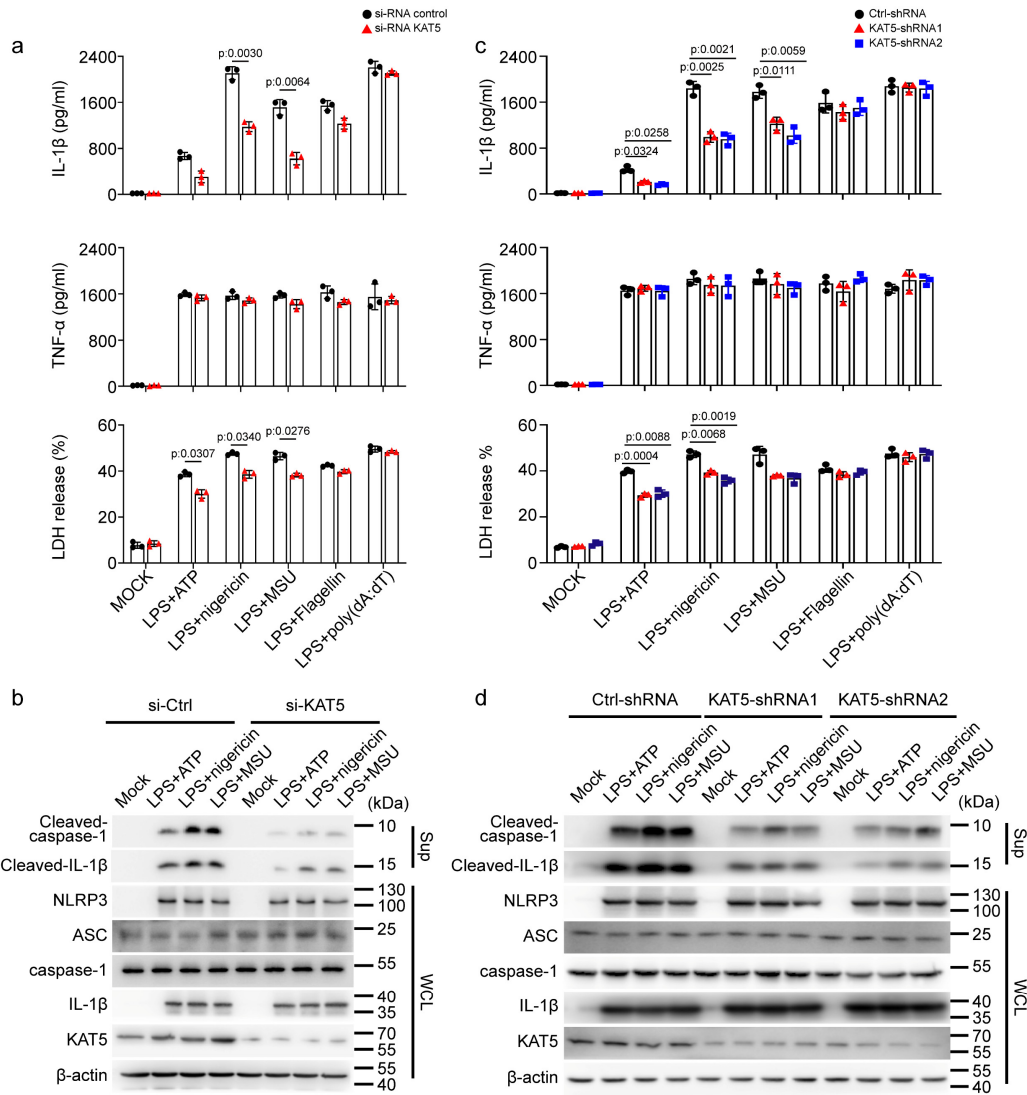

### Supplementary Figure 5. KAT5 promotes NLRP3 inflammasome activation.

**a, b** Mouse peritoneal macrophages transfected with siRNA control or KAT5 were treated with LPS (100 ng/mL, 3 h) along or with ATP (5 mM, 1 h), nigericin (10  $\mu$ M, 1 h), MSU (200  $\mu$ g/mL, 6 h), Flagellin transfection (2  $\mu$ g/mL, 1 h) or poly (dA:dT) transfection (1  $\mu$ g/mL, 16 h).  $n=3$  biologically independent experiments. **a** ELISA analysis of IL-1 $\beta$ , TNF- $\alpha$  and release of LDH in supernatants. **b** Cell Lysates and supernatant were subjected to western blot analysis. casp-1(caspase-1). **c, d** iBMDMs stably expressing shRNAs targeting KAT5(shRNA-1and shRNA-2) were treated with LPS (1 $\mu$ g/mL, 6 h) along or with ATP (10 mM, 1 h), nigericin (20  $\mu$ M, 1 h), MSU (400  $\mu$ g/mL, 6 h), Flagellin transfection (4  $\mu$ g/mL, 1h) or poly (dA:dT) transfection (2  $\mu$ g/mL, 16 h). **c** ELISA analysis of IL-1 $\beta$ , TNF- $\alpha$  and release of LDH in supernatants. **d** Cell

Lysates and supernatant were subjected to western blot analysis. Results are represented as mean $\pm$  SD and typical photographs are representative of three biological independent experiments with similar results. Statistical analyses were carried out via two-way ANOVA with the Bonferroni test for **a**, **c**. Source data are provided as a Source Data file.

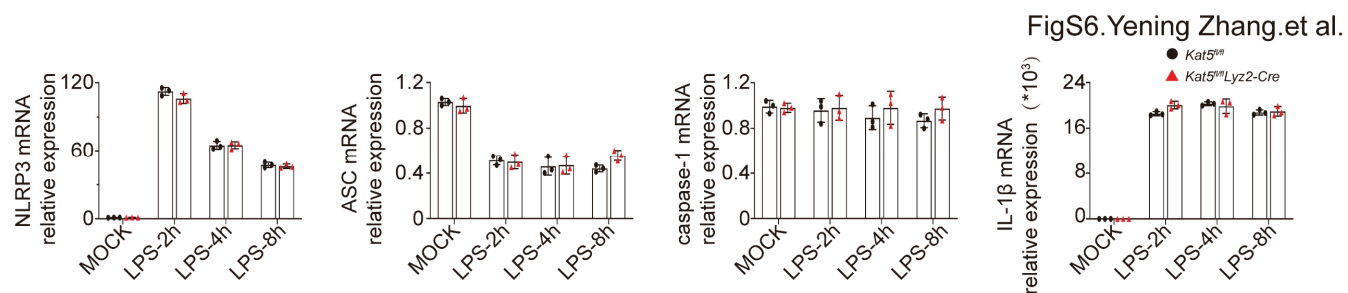

**Supplementary Figure 6. KAT5 have no effects on the mRNA expression of NLRP3 inflammasome components.**

Relative NLRP3, ASC, caspase-1, IL-1 $\beta$  mRNA expression of *Kat5<sup>fl/fl</sup>* or *Kat5<sup>fl/fl</sup>Lyz2-Cre* BMDMs challenged with LPS (100 ng/mL) for indicated time (0, 2, 4 or 8 h). n=3 biologically independent experiments. Results are represented as mean $\pm$  SD. Statistical analyses were carried out via two-way ANOVA with the Bonferroni test. Source data are provided as a Source Data file.

FigS7.Yening Zhang.et al.

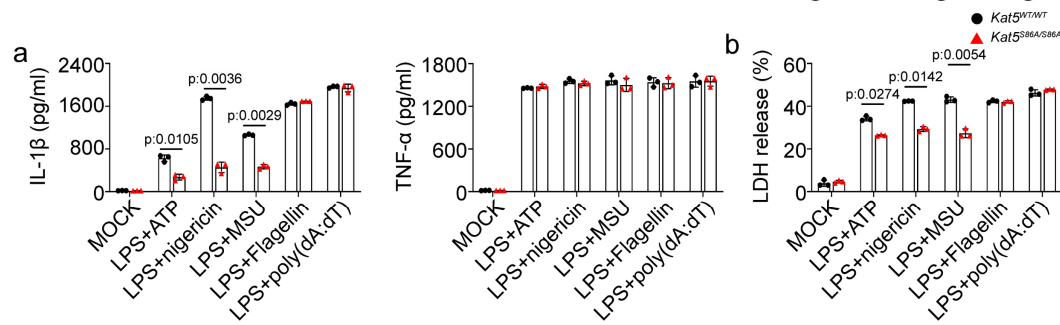

**Supplementary Figure 7. *Kat5<sup>S86A/S86A</sup>* inhibits NLRP3 inflammasome activation**

**a, b** *Kat5<sup>WT/WT</sup>* or *Kat5<sup>S86A/S86A</sup>* BMDMs were treated with LPS (100 ng/mL, 3 h) along or with ATP (5 mM, 1 h), nigericin (10 μM, 1 h), MSU (200 μg/mL, 6 h), Flagellin transfection (2 μg/mL, 1 h) or poly (dA:dT) transfection (1 μg/mL, 16 h). n=3 biologically independent experiments. **a** ELISA of IL-1β, TNF-α in supernatants. **b** release of LDH in supernatants. Results are represented as mean ± SD. Statistical analyses were carried out via two-way ANOVA with the Bonferroni test for **a, b**. Source data are provided as a Source Data file.

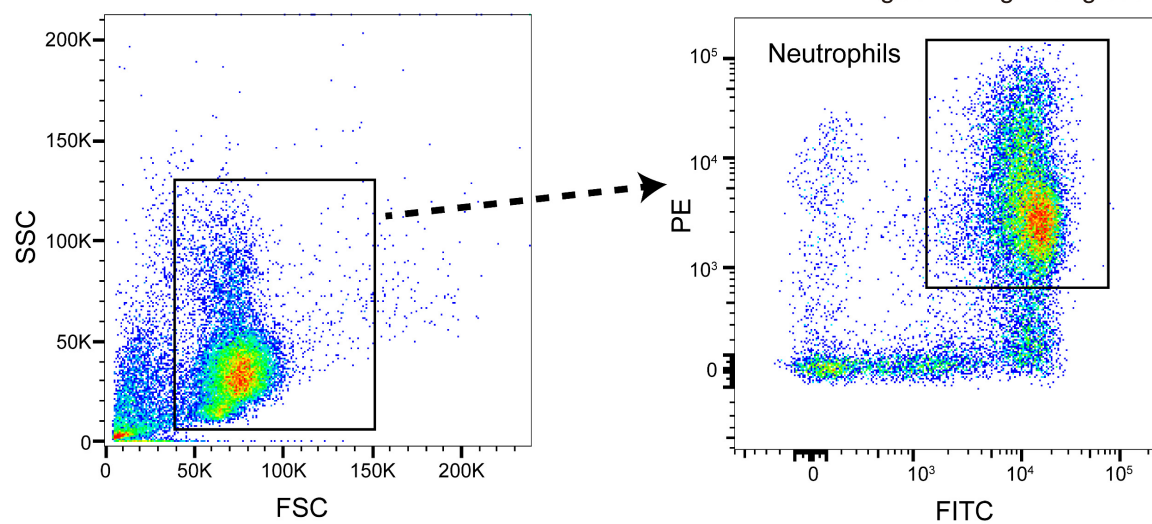

**Supplementary Figure 8. Gate strategies of neutrophils in peritoneal lavage fluid**

Peritoneal lavage cells were assessed by flow cytometry. The Gated neutrophils are FITC+ PE+.

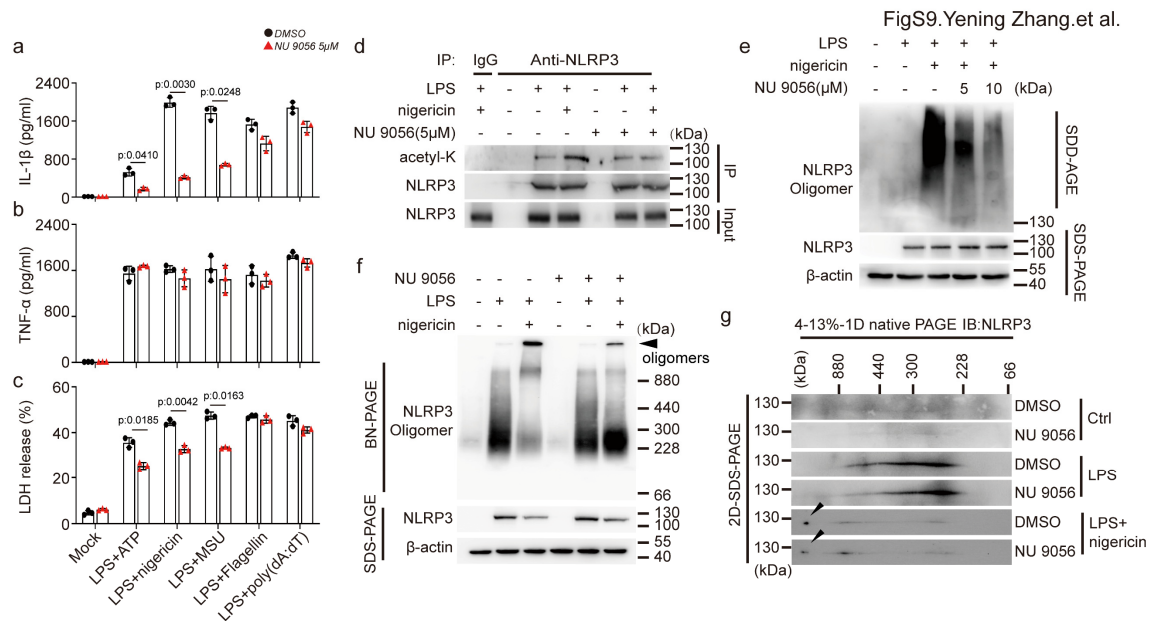

**Supplementary Figure 9. NU9056 specifically blocks NLRP3 inflammasome activation *ex vivo*.**

**a-f** LPS-primed (100 ng/mL, 3 h) mouse peritoneal macrophages treated with or without NU 9056 for 30 min followed with LPS (100 ng/mL, 3 h) along or with ATP (5 mM, 1 h), nigericin (10  $\mu$ M, 1 h), MSU (200  $\mu$ g/mL, 6 h), Flagellin transfection (2  $\mu$ g/mL, 1 h) or poly (dA:dT) transfection (1  $\mu$ g/mL, 16 h). n=3 biologically independent experiments. **a**, **b** ELISA of IL-1 $\beta$ , TNF- $\alpha$  in supernatants. **c** release of LDH in supernatants. **d** Immunoblot analysis of acetylation level of NLRP3. **e-g** Immunoblot analysis of NLRP3 oligomerization and NLRP3 expression by SDD-AGE, BN-PAGE and 2D-SDS-PAGE analysis. Results are represented as mean  $\pm$  SD and typical photographs are representative of three biological independent experiments with similar results. Statistical analyses were carried out via two-way ANOVA with the Bonferroni test for **a-c**. Source data are provided as a Source Data file.

**Supplementary Table1**

| REAGENT or RESOURCE                                                  | SOURCE                    | IDENTIFIER                 |
|----------------------------------------------------------------------|---------------------------|----------------------------|
| <b>Antibodies</b>                                                    |                           |                            |
| Anti-caspase-1 antibody                                              | abcam                     | ab179515                   |
| Anti-IL-1 $\beta$ antibody                                           | RD systems                | AF-401-NA; RRID: AB_416684 |
| Anti-KAT5 antibody                                                   | abcam                     | ab23886                    |
| Anti-NLRP3 antibody                                                  | Adipogen                  | Cryo-2                     |
| Anti-NLRP3 antibody                                                  | CST                       | 15101                      |
| Anti-ASC antibody                                                    | Adipogen                  | AL177                      |
| Anti- $\beta$ -actin antibody                                        | Cell Signaling Technology | 4967                       |
| Anti-NEK7 antibody                                                   | abcam                     | ab133514                   |
| Anti-GOLGA4 antibody                                                 | Abclonal                  | A10216                     |
| Anti-TGN38 antibody                                                  | NOVUS                     | NBP1-03495                 |
| Anti-acetyl lysine mouse mAb(clone Kac-01) antibody                  | PTM BIO                   | PTM-101                    |
| Anti-DDDDK-tag                                                       | MBL                       | M185-3L                    |
| Anti-Myc-tag                                                         | MBL                       | M047-3                     |
| Mouse anti GST-Tag mAb                                               | ABclonal                  | AE001                      |
| Cy3-conjugated Affinipure Goat Anti-Rabbit IgG(H+L)                  | Protein-tech              | SA00009-2                  |
| Alexa Fluor® 488 Goat anti-mouse IgG (minimal x-reactivity) Antibody | Biolegend                 | 405319                     |
| Alexa Fluor 594-conjugated secondary antibody                        | Biolegend                 | 405326                     |
| DAPI                                                                 | Beyotime                  | P0131                      |
| PE anti-mouse Ly-6C Antibody                                         | Biolegend                 | 128007                     |
| FITC anti-mouse/human CD11b Antibody                                 | Biolegend                 | 101205                     |
| <b>Chemicals, Peptides, and Recombinant Proteins</b>                 |                           |                            |
| Ultrapure LPS (E. coli 0111:B4)                                      | InvivoGen                 | tlrl-3pelps                |
| Lipopolysaccharide derived from Escherichia coli 0111:B4             | Sigma                     | L2630                      |
| ATP                                                                  | InvivoGen                 | tlrl-atpl                  |
| nigericin                                                            | InvivoGen                 | tlrl-nig                   |
| MSU                                                                  | InvivoGen                 | tlrl-msu                   |
| FLA-ST                                                               | InvivoGen                 | tlrl-stfla                 |
| poly(dA:dT) naked                                                    | InvivoGen                 | tlrl-patn                  |
| Imiquimod                                                            | Invivogen                 | R837                       |
| nicotinamide                                                         | Selleck                   | S1899                      |
| trichostatin A                                                       | Selleck                   | S1045                      |
| MB-3                                                                 | MCE                       | HY-129039                  |
| WM-119                                                               | Sigma                     | SML3067                    |
| SI-2 hydrochloride                                                   | MCE                       | HY-101447A                 |
| PF-CBP1-HCL                                                          | Selleck                   | S8180                      |
| C646                                                                 | Selleck                   | S7152                      |
| CPI-637                                                              | Selleck                   | S8190                      |
| Curcumin                                                             | Selleck                   | S1848                      |

|                                         |                                                    |                                 |
|-----------------------------------------|----------------------------------------------------|---------------------------------|
| SGC-CBP30                               | Selleck                                            | S7256                           |
| Acetyl-CoA                              | Sigma                                              | A2181                           |
| Lipofectamine 3000 Transfection Reagent | ThermoFisher Scientific                            | L3000015                        |
| NU9056                                  | Tocris                                             | 4903                            |
| Cell Lysis Buffer                       | Cell Signaling Technology                          | 9803                            |
| Mouse immunoglobulin IgG protein        | Abcam                                              | ab198772                        |
| Protein A/G PLUS-Agarose                | Santa cruz                                         | sc-2003                         |
| Glutathione Sepharose™ 4B               | GE Healthcare                                      | 17-0756-01                      |
| Recombinant murine NLRP3-His protein    | Sino Biological Inc                                | N/A                             |
| Recombinant murine KAT5-GST protein     | Sino Biological Inc                                | N/A                             |
| Recombinant GST protein                 | Sino Biological Inc                                | N/A                             |
| Pierce™ Anti-c-Myc Agarose              | ThermoFisher Scientific                            | 20168                           |
| Anti-Flag affinity gel                  | Sigma                                              | A2220                           |
| pLenti-CRISPR v2                        | Addgene                                            | #52961                          |
| Lipofectamine™ RNAiMAX                  | ThermoFisher Scientific                            | 13778030                        |
| First-Strand cDNA Synthesis SuperMix    | TransGen Biotech                                   | AT34                            |
| SYBR qPCR Master Mix                    | Vazyme Biotech                                     | Q711-02/03                      |
| Critical Commercial Assays              |                                                    |                                 |
| Mouse IL-1 $\beta$ ELISA kit            | eBioscience                                        | 88-7013                         |
| Mouse TNF- $\alpha$ ELISA kit           | eBioscience                                        | 88-7324                         |
| BeyoGel™ Blue Native Precast PAGE Gel   | Beyotime                                           | P0545S                          |
| LDH Cytotoxicity Assay Kit              | Beyotime                                           | C0017                           |
| Experimental Models: Cell Lines         |                                                    |                                 |
| Mouse Macrophages                       | Prepared in B.L. Lab                               | Described in current manuscript |
| HEK293T cells                           | American Type Culture Collection<br>(Manassas, VA) | N/A                             |
| COS-7 cells                             | American Type Culture Collection<br>(Manassas, VA) | N/A                             |
| NLRP3 <sup>-/-</sup> iBMDM cells        | Prepared in B.L. Lab                               | Described in current manuscript |
| Experimental Models: Organisms/Strains  |                                                    |                                 |
| C57BL/6 mice                            | Hunan SJA Laboratory Animal<br>Co.Ltd              | N/A                             |
| <i>KAT5<sup>fl/fl</sup></i>             | Prepared in Deepak Bararia Lab                     | Described in current manuscript |
| <i>KAT5<sup>S86A/S86A</sup></i>         | Prepared in Shengcai Li Lab                        | Described in current manuscript |
| <i>Lyz2-Cre</i>                         | Jackson laboratories                               | N/A                             |
| Oligonucleotides                        |                                                    |                                 |
| CCACACUGCAGUAUCUCAATT                   | Sangon Biotech Co.                                 | KAT5-specific siRNA             |
| UUCUCCGAACGUGACAGUTT                    | Sangon Biotech Co.                                 | Control siRNA                   |
| 5'-CTGCAACGCCACTTGACCAAA-3'             | Genechem Co                                        | KAT5-specific shRNA1            |
| 5'-CTGCTTATTGAGTTCAGCTAT-3'             | Genechem Co                                        | KAT5-specific shRNA2            |
| 5'-TTCTCCGAACGTGTCACGT-3'               | Genechem Co                                        | Control shRNA                   |
| Fwd: 5'-TCCCGGTCCAGATCAGCTC-3'          | Sangon Biotech Co.                                 | KAT5-specific primers           |

|                                                  |                           |                                 |
|--------------------------------------------------|---------------------------|---------------------------------|
| Rev: 5'-ACCTTCCGTTTCGTTGAGCG-3'                  |                           |                                 |
| Fwd: 5'-CTGTGTCAGGGGATGAACTCAAAATT-3'            | Sangon Biotech Co.        | ASC-specific primers            |
| Rev: 5'-GCCATACGACTCCAG ATAGTAGC-3'              |                           |                                 |
| Fwd: 5'-ACAAGGCACGGG ACCTATG-3'                  | Sangon Biotech Co.        | caspase-1-specific primers      |
| Rev: 5'-TCCCAGTCAGTCCTGGAAATG-3'                 |                           |                                 |
| Fwd: 5'-TGGATGGGTTTGCTGGGAT-3'                   | Sangon Biotech Co.        | NLRP3-specific primers          |
| Rev: 5'-CTGCGTGTAGCGACTGTTGAG-3'                 |                           |                                 |
| Fwd: 5'-GCAACTGTTCTGAACTCAACT-3'                 | Sangon Biotech Co.        | IL-1 $\beta$ -specific primers  |
| Rev: 5'-ATCTTTTGGGGTCCGTCAACT-3'                 |                           |                                 |
| Fwd: 5'-AGTGTGACGTTGACATCCGT-3'                  | Sangon Biotech Co.        | $\beta$ -actin-specific primers |
| Rev: 5'-GCAGCTCAGTAACAGTCCGC-3'                  |                           |                                 |
| Fwd: 5'-GACCTCAAGAAATTCAGAATGCATTTGGA<br>AGAT-3' | Sangon Biotech Co.        | NLRP3-K24R specific primers     |
| Rev: 5'-ATCTTCCAAATGCATTCTGAATTCTTGAG<br>GTC-3'  |                           |                                 |
| Fwd: 5'-ACCATCCTAGCCAGGAGGATTATGTTGGA<br>CTGG-3' | Sangon Biotech Co.        | NLRP3-K234R specific primers    |
| Rev: 5'-CCAGTCCAACATAATCCTCCTGGCTAGGAT<br>GGT-3' |                           |                                 |
| Fwd: 5'-CAAGTTTTGTGTGAAAGGATGAAGGACC<br>CACAG-3' | Sangon Biotech Co.        | NLRP3-K875R specific primers    |
| Rev: 5'-CTGTGGGTCCTTCATCCTTCACACAAAA<br>CTTG-3'  |                           |                                 |
| Software and Algorithms                          |                           |                                 |
| Graphpad Prism 9 software                        | Graphpad Prism 8 software | N/A                             |
| Adobe Illustrator CS6                            | Adobe                     | N/A                             |
| Adobe Photoshop CC                               | Adobe                     | N/A                             |
| Microsoft Excel                                  | Microsoft                 | N/A                             |
